# Supplementary material for: Rapid and ultrasensitive E. coli O157:H7 quantitation by combination of ligandmagnetic nanoparticles enrichment with fluorescent nanoparticles based two-color flow cytometry
Source: Royal Society of Chemistry journal article supplement (doi:10.1039/c1an15413c), 2011-01-01
Supplement: c1an15413c.pdf [file c1an15413c.pdf]

# Rapid and Ultrasensitive *E. coli* O157:H7 Quantitation by Combination of Ligandmagnetic Nanoparticles Enrichment with Fluorescent Nanoparticles Based Two-Color Flow Cytometry

Xiaoxiao He, Lixia Zhou, Dinggeng He, Kemin Wang \*, Jie Cao

State Key Laboratory of Chemo/Biosensing and Chemometrics, College of Biology, College of Chemistry & Chemical Engineering, Hunan University. Key Laboratory for Bio-Nanotechnology and Molecule Engineering of Hunan Province, Changsha 410082, China.

\*To whom correspondence should be addressed. E-mail: [kmwang@hnu.cn](mailto:kmwang@hnu.cn). Phone: +86-731-88821566. Fax: +86-731-88821566.

15

20

25

30

35

40

45

50

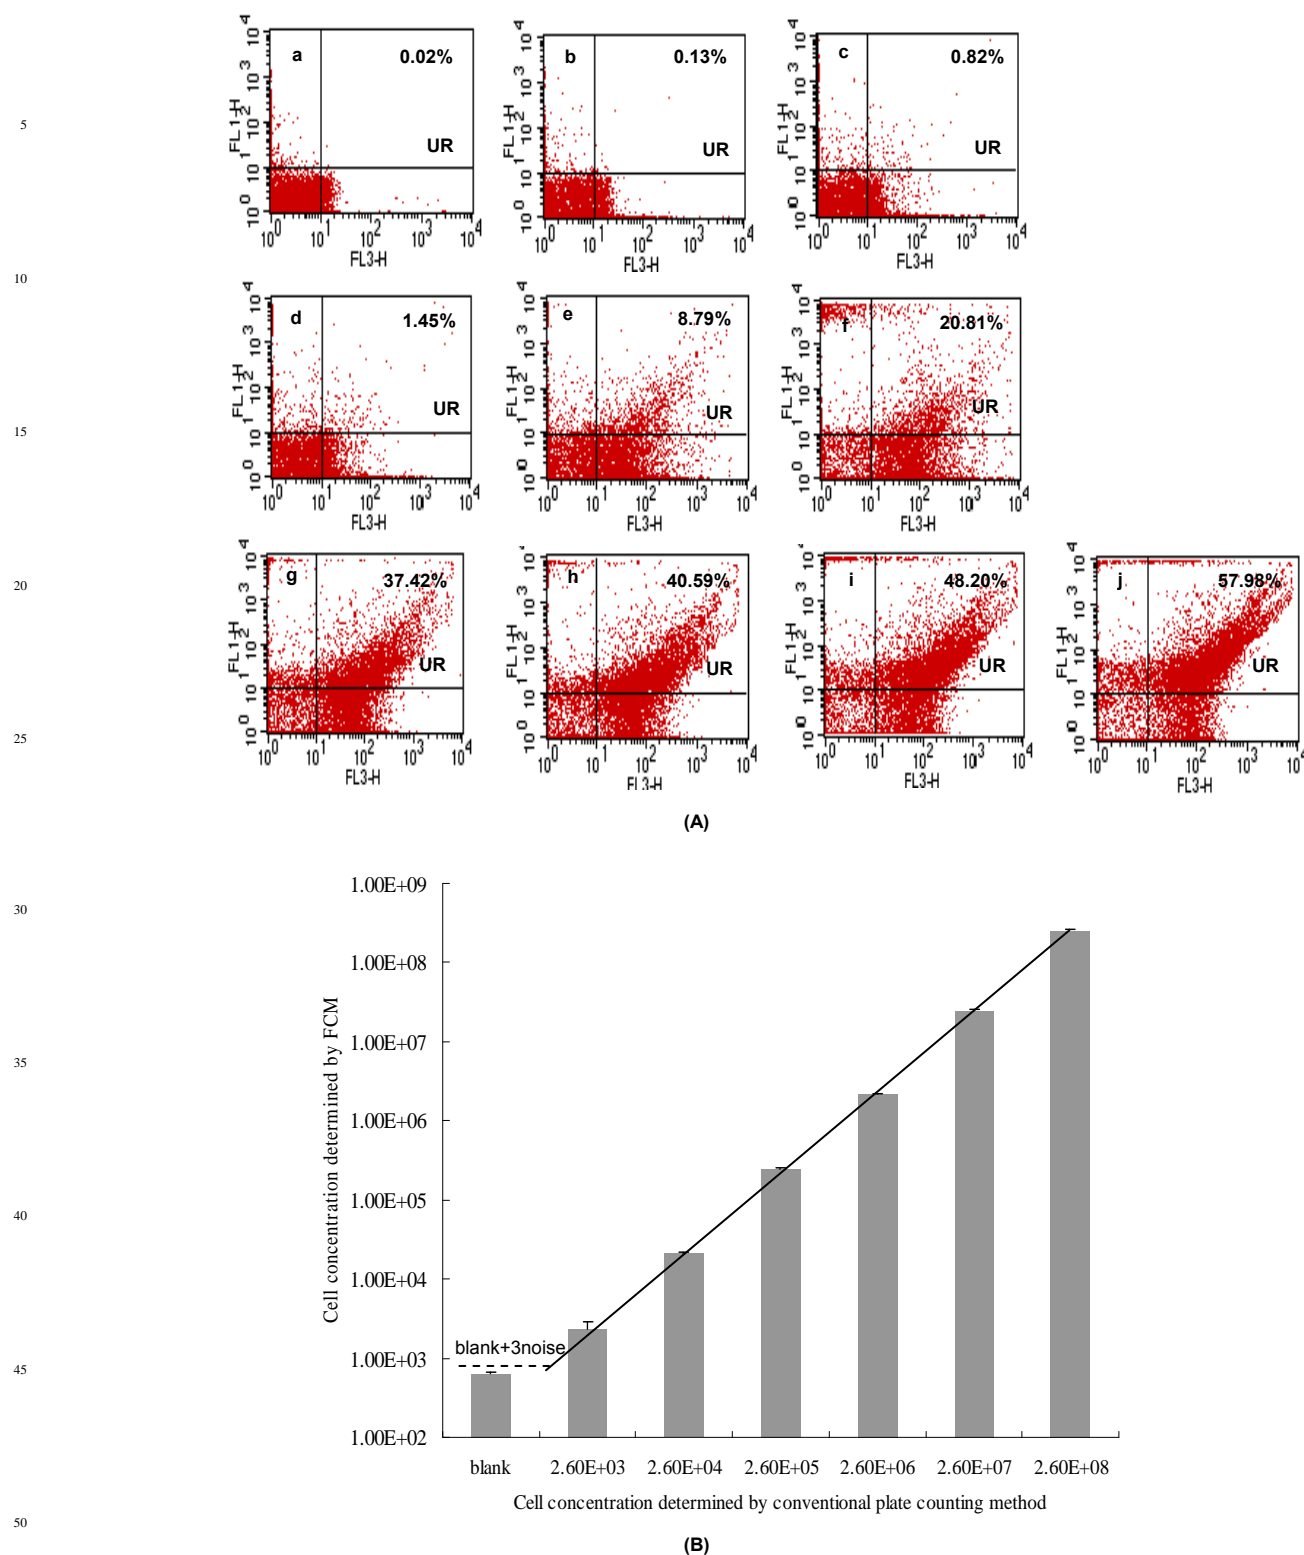

**Figure S1.** (A) The non-enrichment FSiNPs-FCM method for *E. coli* O157:H7 detection. (a. blank; b.  $1.3 \times 10^1$  cells mL<sup>-1</sup>; c.  $2.6 \times 10^1$  cells mL<sup>-1</sup>; d.  $2.6 \times 10^2$  cells mL<sup>-1</sup>; e.  $2.6 \times 10^3$  cells mL<sup>-1</sup>; f.  $2.6 \times 10^4$  cells mL<sup>-1</sup>; g.  $2.6 \times 10^5$  cells mL<sup>-1</sup>; h.  $2.6 \times 10^6$  cells mL<sup>-1</sup>; i.  $2.6 \times 10^7$  cells mL<sup>-1</sup>; j.  $2.6 \times 10^8$  cells mL<sup>-1</sup>). (B) Graph comparing cell counts for *E. coli* O157:H7 determined by the conventional plate counting method with those obtained by non-enrichment FSiNPs-FCM method.

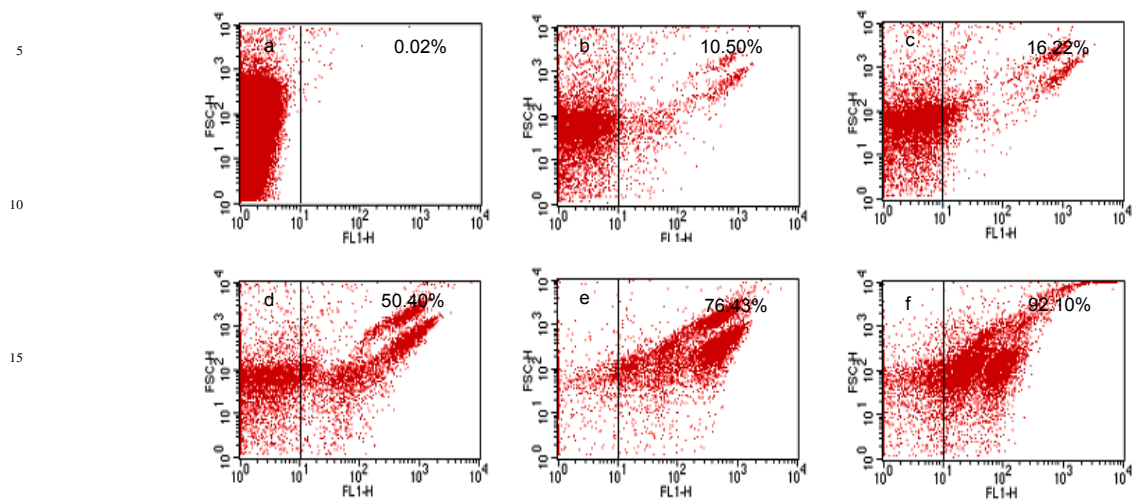

(A)

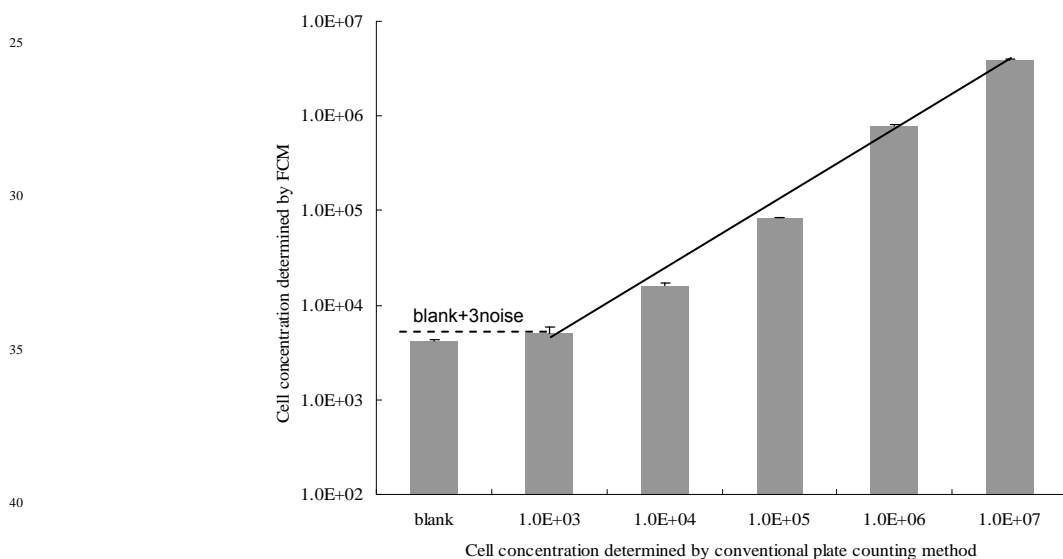

(B)

45 **Figure S2.** (A) Conventional flow cytometry used commercial FITC-conjugated goat anti-*E. coli* O157:H7 antibody for detection of *E. coli* O157:H7 in pure culture (a. blank; b.  $1.0 \times 10^3$  cells  $\text{mL}^{-1}$ ; c.  $1.0 \times 10^4$  cells  $\text{mL}^{-1}$ ; d.  $1.0 \times 10^5$  cells  $\text{mL}^{-1}$ ; e.  $1.0 \times 10^6$  cells  $\text{mL}^{-1}$ ; f.  $1.0 \times 10^7$  cells  $\text{mL}^{-1}$ ). (B) Graph comparing cell counts for *E. coli* O157:H7 determined by the conventional plate counting method with those obtained by FITC-based conventional FCM method.

50

55

**Table S1.** Feasibility test of LMNPs@FSiNPs-FCM method for *E. coli* O157:H7 detection

5

| No. | Target                                                          | LMNPs | Unmodified magnetic nanoparticles | Ab-FSiNPs | COOH-FSiNPs | SYBR-I | FCM assay |
|-----|-----------------------------------------------------------------|-------|-----------------------------------|-----------|-------------|--------|-----------|
| a   | $5.0 \times 10^3$ cells mL <sup>-1</sup> <i>E. coli</i> O157:H7 | +     | - +                               | -         | -           | +      | 2-color   |
| b   | $5.0 \times 10^3$ cells mL <sup>-1</sup> <i>E. coli</i> O157:H7 | + -   |                                   | -         | +           | +      | 2-color   |
| c   | $5.0 \times 10^3$ cells mL <sup>-1</sup> <i>E. coli</i> O157:H7 | - +   |                                   | +         | -           | +      | 2-color   |
| d   | sterile PB buffer                                               | + -   |                                   | + -       |             | +      | 2-color   |
| e   | $5.0 \times 10^3$ cells mL <sup>-1</sup> <i>E. coli</i> O157:H7 | + -   |                                   | + -       |             | -      | 1-color   |
| f   | $5.0 \times 10^3$ cells mL <sup>-1</sup> <i>E. coli</i> O157:H7 | + -   |                                   | -         | +           | -      | 1-color   |
| g   | $5.0 \times 10^3$ cells mL <sup>-1</sup> <i>E. coli</i> O157:H7 | - +   |                                   | +         | -           | -      | 1-color   |
| h   | sterile PB buffer                                               | + -   |                                   | + -       |             | -      | 1-color   |

10

15

20

25
